# Supplementary material
Source: Springer Nature journal article supplement (https://www.springermedizin.de/resource/supplementary/12876_2012_882_MOESM2_ESM.pdf/9437538)

# Cost-effectiveness acceptability curve

unadjusted/adjusted for baseline costs

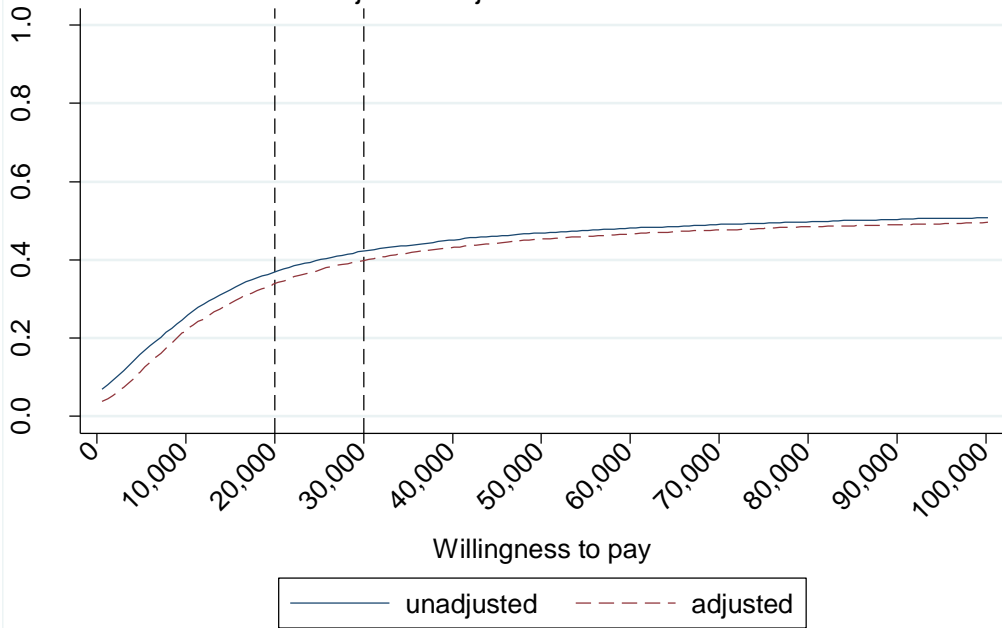

Supplement: MOESM2 [file 9437538]
